# Supplementary material for: Phylogenomics Reveals Three Sources of Adaptive Variation during a Rapid Radiation
Source: PubMed Central journal article supplement (PMC4752443; doi:10.1371/journal.pbio.1002379), 2016-02-12
Supplement: pbio.1002379.s002.pdf [file pbio.1002379.s002.pdf]

Figure S1

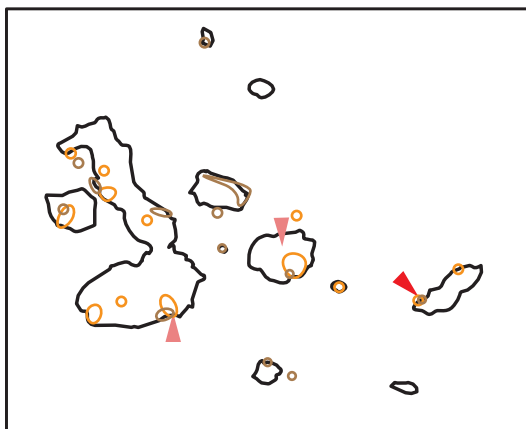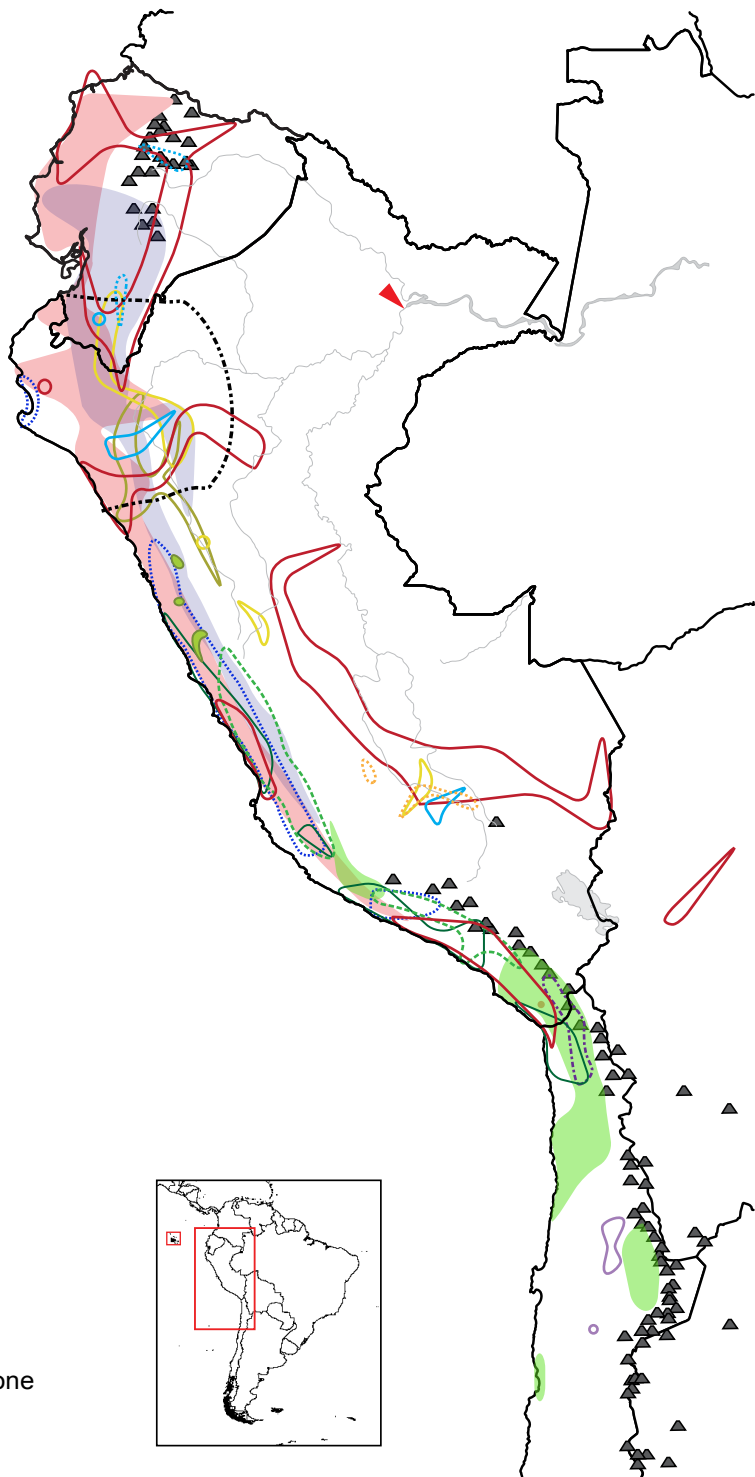

|                         |                                                   |
|-------------------------|---------------------------------------------------|
| Esculentum group        | <i>S. cheesmaniae</i>                             |
|                         | <i>S. galapagense</i>                             |
|                         | <i>S. lycopersicum</i><br><i>var. cerasiforme</i> |
|                         | <i>S. pimpinellifolium</i>                        |
| Arcanum group           | <i>S. chmielewskii</i>                            |
|                         | <i>S. neorickii</i>                               |
|                         | <i>S. arcanum</i>                                 |
| Peruvianum group        | <i>S. huaylasense</i>                             |
|                         | <i>S. corneliomulleri</i>                         |
|                         | <i>S. peruvianum</i>                              |
|                         | <i>S. chilense</i>                                |
| Hirsutum group          | <i>S. habrochaites</i>                            |
|                         | <i>S. pennellii</i>                               |
| Lycopersicoides section | <i>S. lycopersicoides</i>                         |
|                         | <i>S. sitiens</i>                                 |
| Junglandifolia section  | <i>S. junglandifolium</i>                         |
|                         | <i>S. ochranthum</i>                              |

- ▲ Major volcanic peak
- - - - Amotape-Huancabamba Zone
