# Supplementary material for: Phylogenomics Reveals Three Sources of Adaptive Variation during a Rapid Radiation
Source: PubMed Central journal article supplement (PMC4752443; doi:10.1371/journal.pbio.1002379), 2016-02-12

**Figure S2**

**A**

RAxML concatenated whole-genome tree with *hua-1360* included (GTRGAMMA, fast bootstrap; all unmarked nodes 100% bootstrap support)

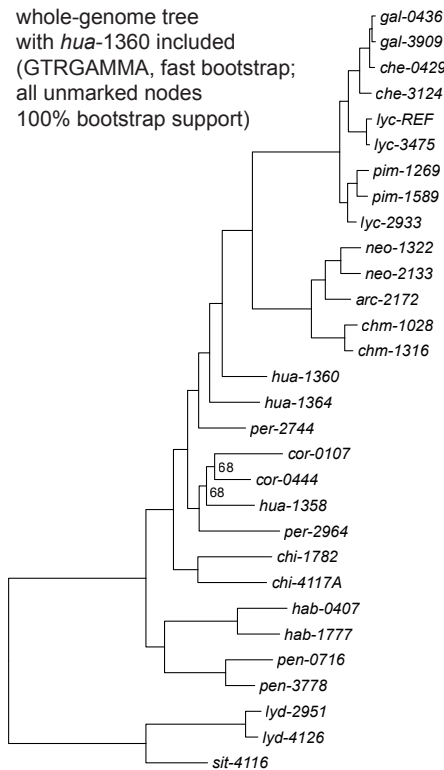

0.002

**B**

RAxML concatenated whole-genome tree using single outgroup accession; domesticated, reticulate, and low coverage accessions were removed; GTRGAMMA; no bootstrap

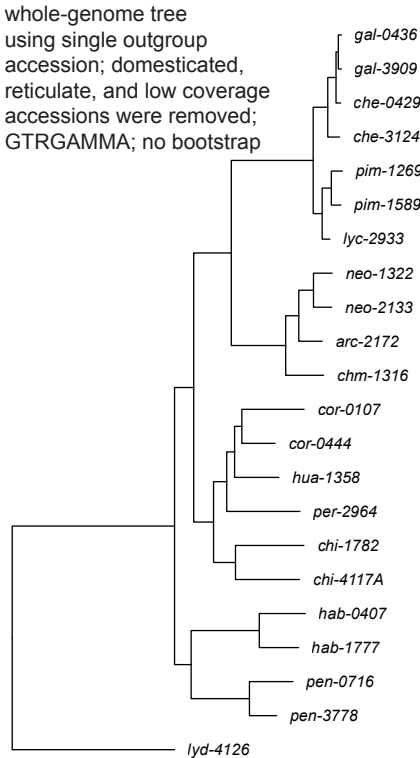

0.002

**C**

RAxML concatenated whole-genome tree for only Peruvianum group accessions (GTRGAMMA, fast bootstrap; all unmarked nodes 100% bootstrap support)

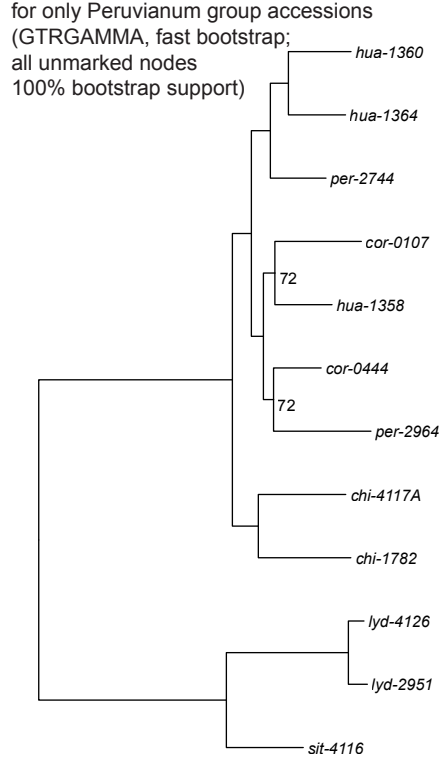

0.002

**D**

RAxML MRE % support / IC / ICA from 100 kb trees (n=2745) TC = 11.602 TCA = 0.446

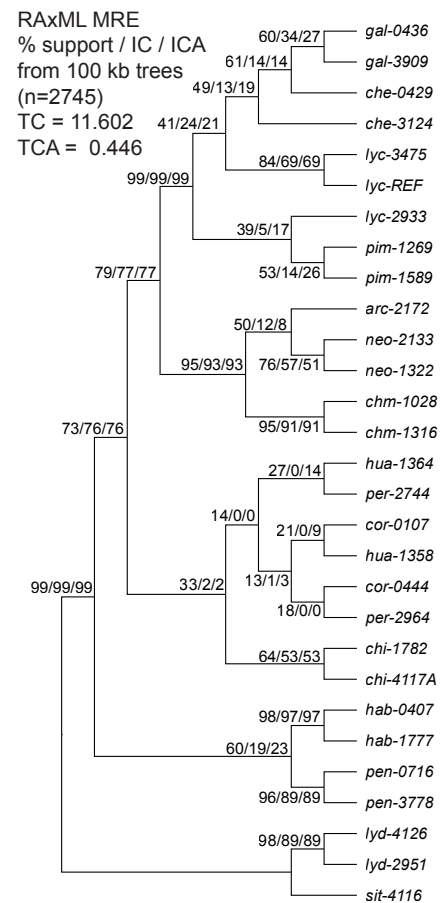

**E**

ASTRAL tree from 100 kb trees (n=2745) with bootstrap support from 100 replicates

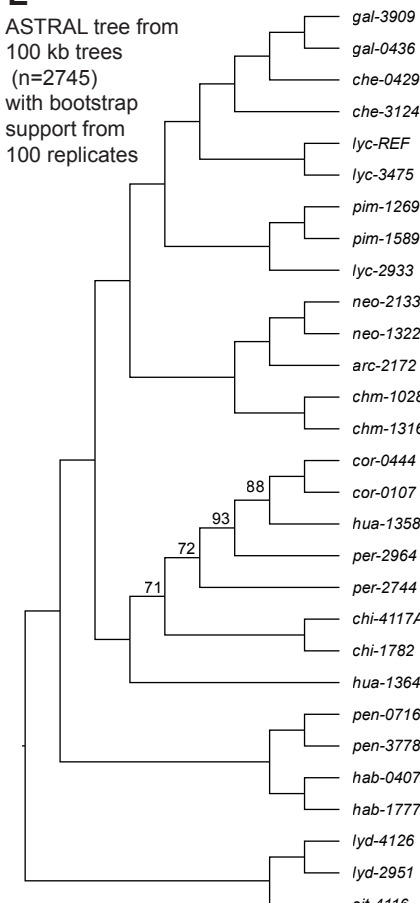

**F**

Best likelihood tree from 100 replicates of MP-EST with 100 kb trees (n=2745) with 100 bootstrap replicates

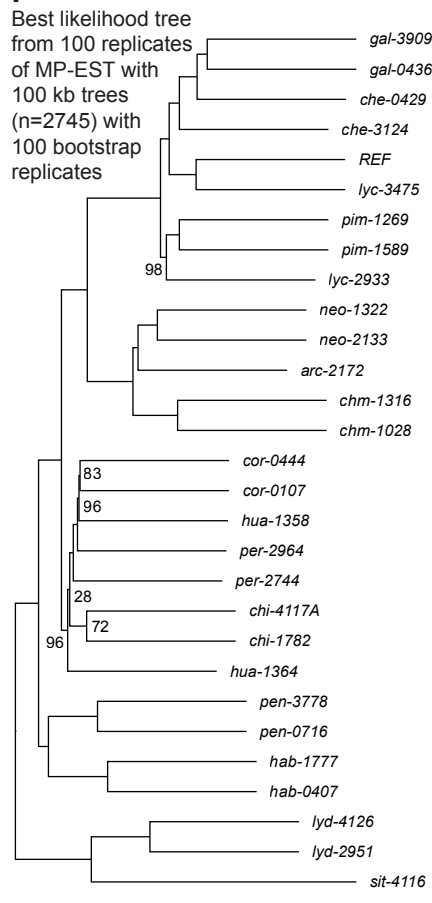

Supplement: pbio.1002379.s003.pdf [file pbio.1002379.s003.pdf]
