# Supplementary material for: Phylogenomics Reveals Three Sources of Adaptive Variation during a Rapid Radiation
Source: PubMed Central journal article supplement (PMC4752443; doi:10.1371/journal.pbio.1002379), 2016-02-12

Figure S3

**A**

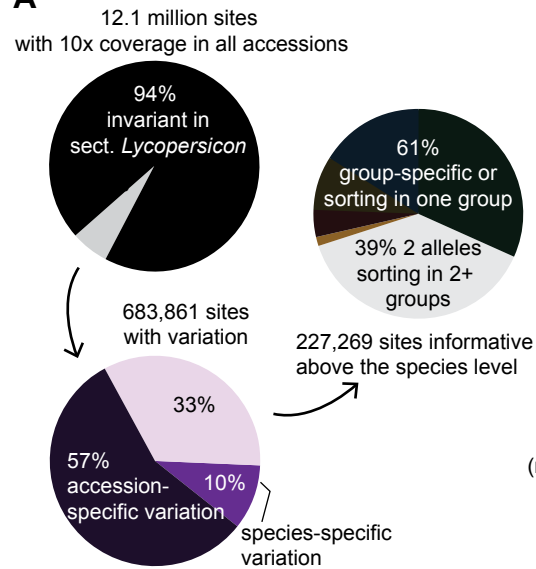

**B**

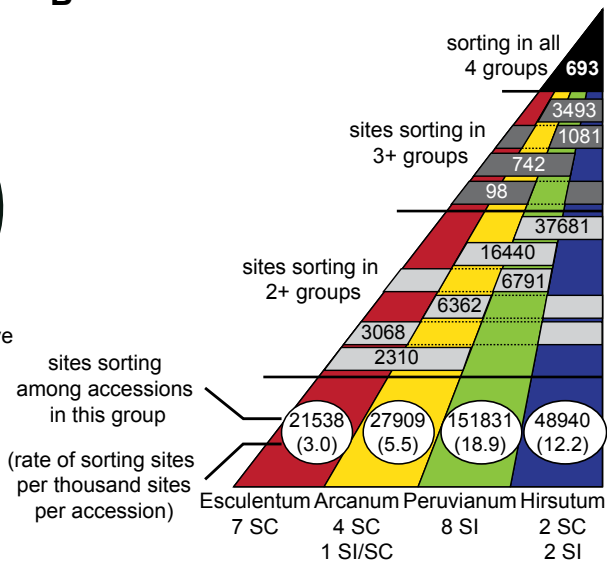

**C**

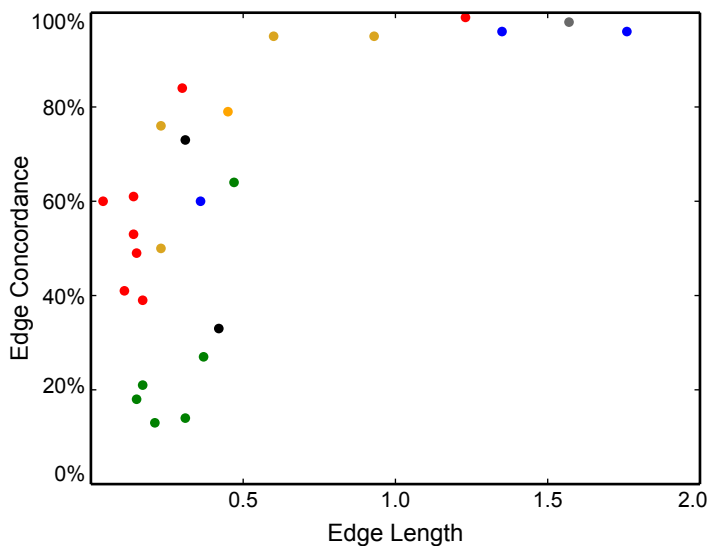

Supplement: pbio.1002379.s004.pdf [file pbio.1002379.s004.pdf]
