# Supplementary material for: Phylogenomics Reveals Three Sources of Adaptive Variation during a Rapid Radiation
Source: PubMed Central journal article supplement (PMC4752443; doi:10.1371/journal.pbio.1002379), 2016-02-12

# Figure S4

## A Proportions of four most common gene trees with *lyd-4126* as outgroup

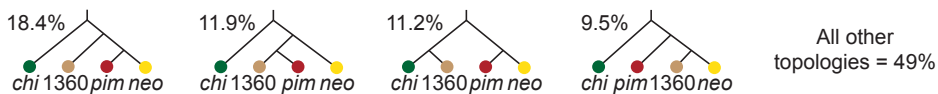

## B Chromoplot for: *hua*-1360, *per*-2964, *pim*-1589

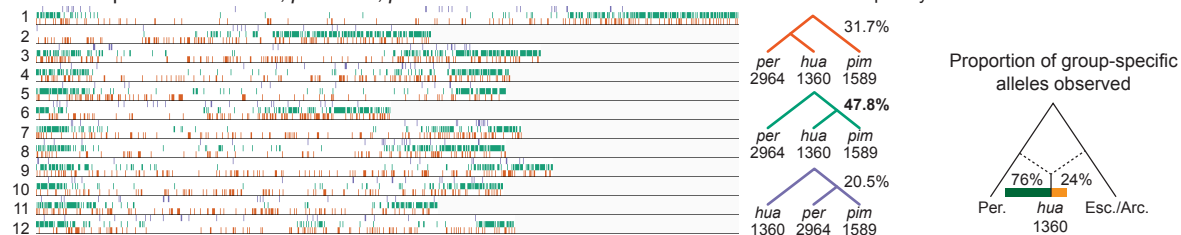

## C Chromoplot for: *hua*-1364, *per*-2964, *pim*-1589

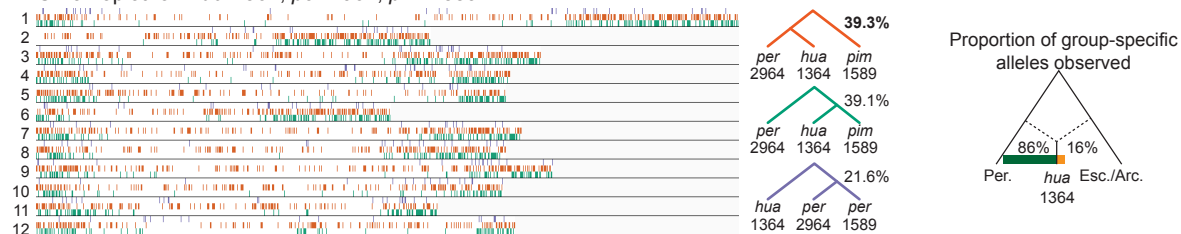

## D Chromoplot for: *per*-2744, *per*-2964, *pim*-1589

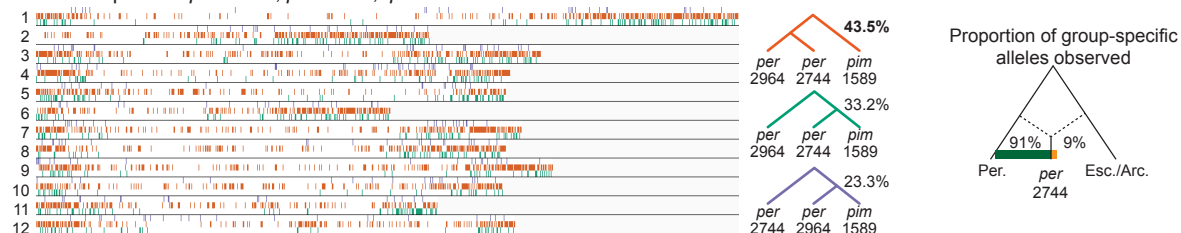

## E Chromoplot for: *pen*-3778, *hab*-1777, *pim*-1589

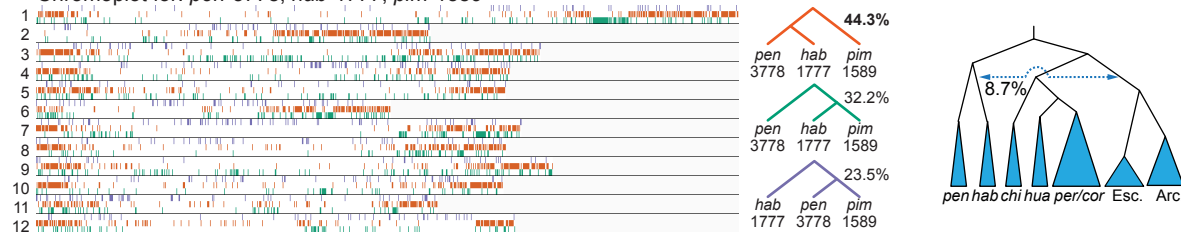

## F Chromoplot for: *cor*-0107, *chi*-4117, *pim*-1589

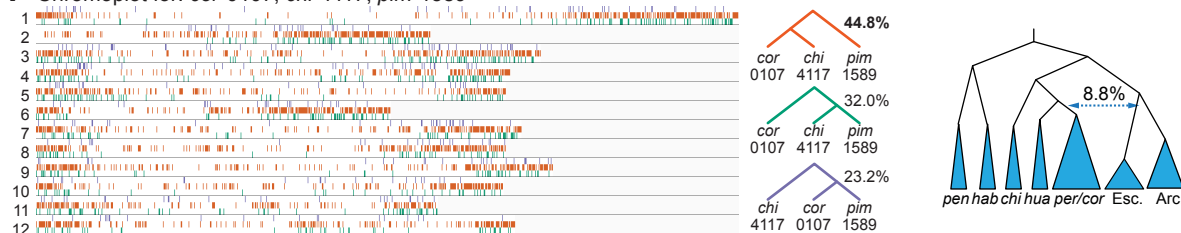

Supplement: pbio.1002379.s005.pdf [file pbio.1002379.s005.pdf]
