# Supplementary material for: Phylogenomics Reveals Three Sources of Adaptive Variation during a Rapid Radiation
Source: PubMed Central journal article supplement (PMC4752443; doi:10.1371/journal.pbio.1002379), 2016-02-12

Figure S5

**A**

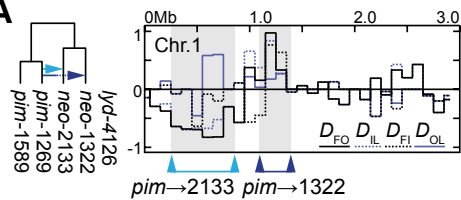

**B** Chromplot for: *neo-2133 neo-1322, pim-1589*

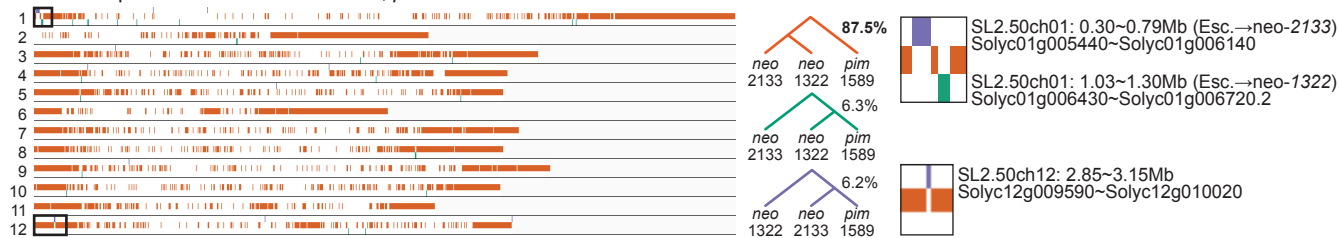

**C** Chromplot for: *pen-3778 chi-1782, chi-4117A*

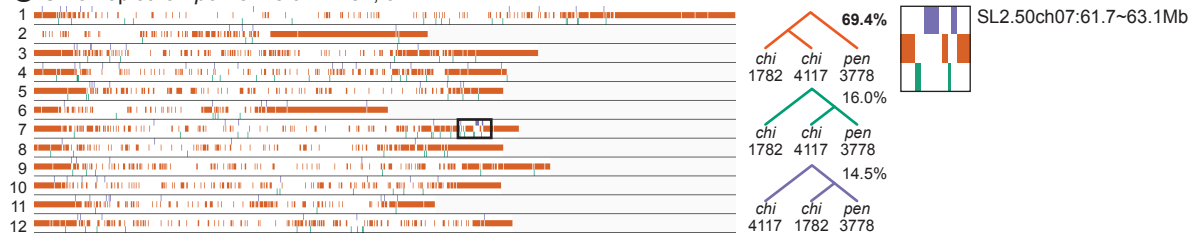

**D** Chromplot for: *pen-3778 pen-0716, pim-1269*

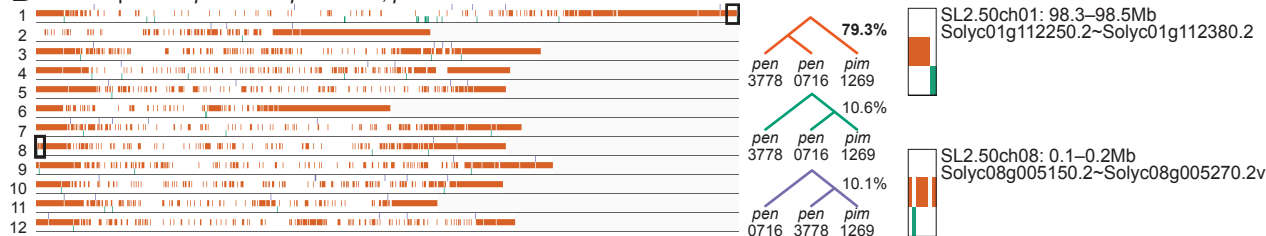

**E** Chromplot for: *cor-0107, cor-0444, hua-1358*

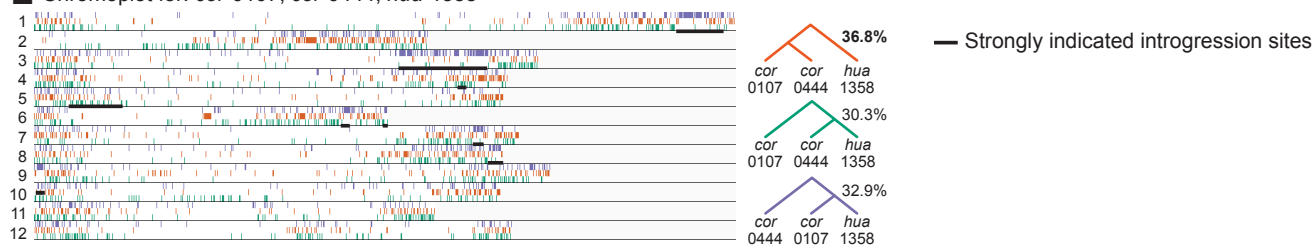

Supplement: pbio.1002379.s006.pdf [file pbio.1002379.s006.pdf]
