# Supplementary material for: Phylogenomics Reveals Three Sources of Adaptive Variation during a Rapid Radiation
Source: PubMed Central journal article supplement (PMC4752443; doi:10.1371/journal.pbio.1002379), 2016-02-12

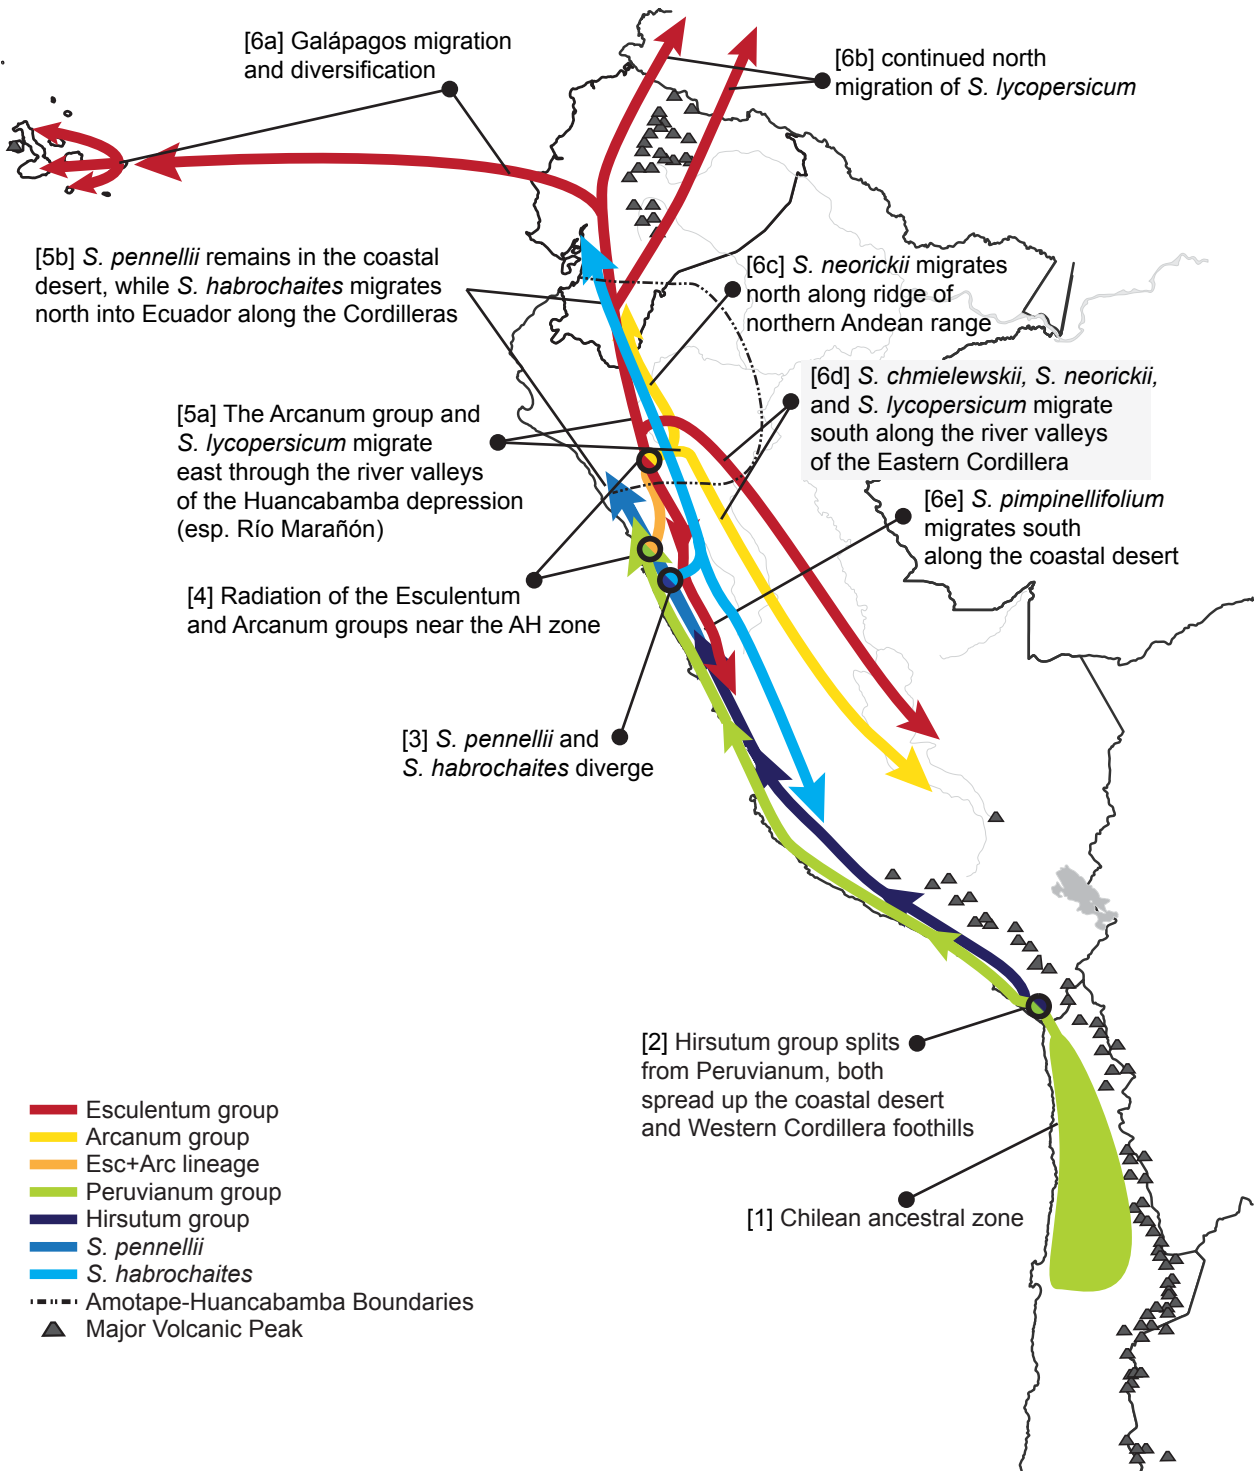

Supplement: pbio.1002379.s007.pdf [file pbio.1002379.s007.pdf]
